# Supplementary material for: Total synthesis of isatindigotindoline C
Source: Royal Society of Chemistry journal article supplement (doi:10.1039/d0ob00270d), 2020-01-01

## Supporting Information

### Total Synthesis of Isatindigotindoline C

Juha H. Siitonen,<sup>\*a</sup> Sherlin Lira,<sup>b</sup> Muhammed Yousufuddin,<sup>b</sup> László Kürti<sup>\*a</sup>

<sup>a</sup>Department of Chemistry, Rice University,  
BioScience Research Collaborative, Houston, Texas 77005, USA.

<sup>b</sup>Life and Health Sciences Department, University of North Texas at Dallas,  
Dallas, Texas 75241, USA.

# Contents

|     |                                                           |    |
|-----|-----------------------------------------------------------|----|
| 1   | General procedures .....                                  | 3  |
| 2   | Synthetic procedures .....                                | 4  |
| 2.1 | <i>epi</i> -Isatinindigotindoline C ( <i>epi-1</i> )..... | 4  |
| 2.2 | Isatinindigotindoline C ( <b>1</b> ).....                 | 5  |
| 3   | NMR data for Isatindingotindoline C .....                 | 6  |
| 3.1 | <sup>13</sup> C Data .....                                | 6  |
| 3.2 | <sup>1</sup> H Data .....                                 | 7  |
| 4   | Computational details.....                                | 9  |
| 5   | Coordinates.....                                          | 9  |
| 5.1 | Isatindigotindoline C .....                               | 9  |
| 5.2 | <i>epi</i> -Isatindigotindoline C .....                   | 11 |
| 6   | X-ray Crystallography .....                               | 13 |
| 7   | Spectral data .....                                       | 16 |

## 1 General procedures

All reactions were carried out under a nitrogen atmosphere in oven-dried glassware unless otherwise noted. Solvents and reagents were used as obtained from the supplier unless otherwise noted. Analytical TLC was performed using Merck silica gel F254 (230–400 mesh) plates and analyzed by UV light or by staining upon heating with ninhydrin solution (0.3 g of ninhydrin, 3 mL AcOH, 100 mL EtOH). For flash chromatography purifications silica gel 60 (230–400 mesh) and p.a. grade solvents were used. The NMR spectra were recorded in DMSO- $d_6$  on a Bruker Avance 600 spectrometer. The chemical shifts are reported in ppm relative to residual DMSO ( $\delta$  2.50) for  $^1\text{H}$  NMR and DMSO- $d_6$  ( $\delta$  39.52) for  $^{13}\text{C}$  NMR. The diastereomeric ratios were determined by  $^1\text{H}$  NMR analysis of crude reaction mixtures. Melting points (mp) were determined in open capillaries using a Mettler Toledo MT50 melting point system and are uncorrected. High-resolution mass spectrometric data were measured using a Waters QTOF XEVO-G2 spectrometer.

## 2 Synthetic procedures

### 2.1 *epi*-Isatinindigotindoline C (*epi*-1)

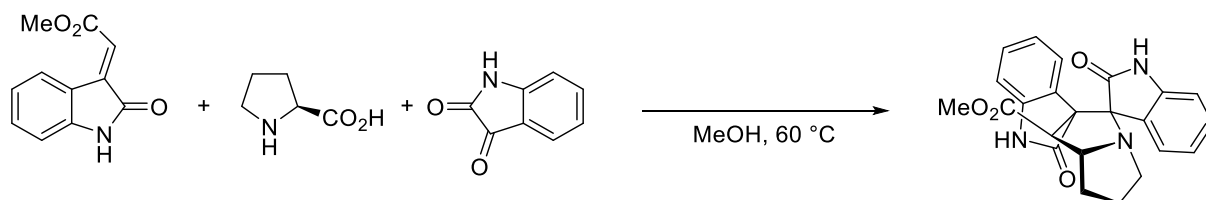

A solution of methyleneindene **2** (5 mmol, 1.02 g, 1.0 equiv.), proline (**5**) (5 mmol, 576 mg, 1.0 equiv.) and isatin (**4**) (5 mmol, 736 mg, 1.0 equiv.) in MeOH (10 ml) was heated at 60 °C. During the first 5 min all solids dissolved and the deep-red solution evolved gas (CO<sub>2</sub>). After 5 min white solid started precipitating out. Starting materials were consumed (TLC 50% EtOAc/Hex) after 3 h, and the reaction mixture was cooled in ice. The reaction mixture was vacuum filtered, and the solid product washed with cold methanol (2 × 2 ml) to yield *epi*-isatindingotindoline C as a white solid (1.75 g, 87 % yield).

**Note:** X-ray quality crystals were obtained by slow evaporation from MeOH/Acetone (1/1 v/v).

**Note:** *epi*-1 is insoluble in most organic solvents (DCM, EtOAc, PhMe, MeOH, EtOH, Acetone).

**MP:** Decomp. >250 °C

**R<sub>f</sub>** (50% EtOAc/Hex): 0.27 (Ninhydrin, blue).

**<sup>1</sup>H NMR** (600 MHz, DMSO-*d*<sub>6</sub>) δ 10.30 (s, 1H), 10.08 (s, 1H), 7.51 (d, *J* = 7.6 Hz, 1H), 7.27 (d, *J* = 7.6 Hz, 1H), 7.17 (td, *J* = 7.7, 1.2 Hz, 1H), 7.07 (td, *J* = 7.7, 1.2 Hz, 1H), 6.92 (td, *J* = 7.7, 1.1 Hz, 1H), 6.83 (td, *J* = 7.7, 1.1 Hz, 1H), 6.60 (d, *J* = 8.3 Hz, 1H), 6.58 (d, *J* = 7.8 Hz, 1H), 4.93 (ddd, *J* = 9.5, 7.1, 4.4 Hz, 1H), 3.61 (d, *J* = 9.5 Hz, 1H), 3.42 (td, *J* = 8.9, 8.4, 6.6 Hz, 1H), 3.15 (s, 3H), 2.57 (ddd, *J* = 9.1, 7.1, 2.2 Hz, 1H), 2.18 – 2.09 (m, 1H), 2.06 – 1.98 (m, 1H), 1.86 – 1.73 (m, 2H).

**{<sup>1</sup>H}<sup>13</sup>C NMR** (151 MHz, DMSO-*d*<sub>6</sub>) δ 178.3 (C=O), 175.7 (C=O), 170.2 (C=O), 142.6 (C), 142.0 (C), 129.5 (CH), 128.4 (CH), 128.2 (CH), 127.1 (CH), 126.3 (C), 124.7 (C), 120.9 (CH), 120.8 (CH), 109.3 (CH), 108.7 (CH), 77.2 (C), 66.3 (CH), 65.4 (CH), 57.4 (CH), 51.2 (CH), 47.2 (CH<sub>2</sub>), 29.5 (CH<sub>2</sub>), 25.8 (CH<sub>2</sub>).

**HRMS** (ESI): *m/z* calcd. for C<sub>23</sub>H<sub>22</sub>N<sub>3</sub>O<sub>4</sub><sup>+</sup> [*M*+*H*] 404.1605 measured 404.1606 Δ = 0.1 mDa.

**FTIR** (ATR, cm<sup>-1</sup>): 3272, 2190, 3145, 3085, 3034, 2954, 1722, 1706, 1616, 1593, 1472, 1208, 1111, 749, 739, 680.

**scXRD:**

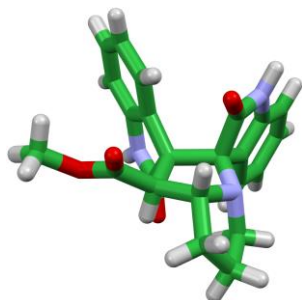

## 2.2 Isatinindigotindoline C (1)

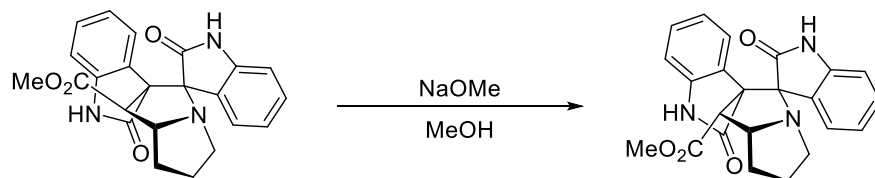

A solution of *epi*-isatinindigotindoline C (100 mg, 1.0 equiv.) in freshly prepared 1 M NaOMe in MeOH (2.5 ml, 10 equiv.) was stirred at rt for 12. The solution was cooled in an ice bath, diluted with ice water (5 mL) and extracted with dichloromethane (5 × 5 mL). The combined organic layers were dried with MgSO<sub>4</sub> and concentrated *in vacuo*. An analytical sample of the thus obtained crude product (97 mg, 97% mass recovery, dr 64:36 based on <sup>1</sup>H NMR) was purified using flash column chromatography (5% 7 M NH<sub>3</sub> in MeOH/DCM) to provide isatinindigotindoline C as a white crystalline solid.

**Note:** The crude mixture is very sparingly soluble in most organic solvents. The material must be loaded to flash column with a minimum amount of DMSO and eluted very slowly to achieve separation. Attempts at loading the crude material in DCM/MeOH or Acetone/MeOH, or dry-loading led to tailing.

**Note:** X-ray quality crystals were obtained by slow evaporation from MeOH/Acetone (1/1 v/v).

**R<sub>f</sub>** (50% EtOAc/Hex): 0.41 (Ninhydrin, brown).

**<sup>1</sup>H NMR** (600 MHz, DMSO-*d*<sub>6</sub>) δ: 10.37 (s, 1H), 10.31 (s, 1H), 7.54 (d, *J* = 7.5 Hz, 1H), 7.19 (d, *J* = 7.5 Hz, 1H), 7.15 (td, *J* = 7.7, 1.1 Hz, 1H), 7.01 (td, *J* = 7.7, 1.1 Hz, 1H), 6.91 (td, *J* = 7.7, 1.0 Hz, 1H), 6.79 (td, *J* = 7.6, 0.9 Hz, 1H), 6.60 (d, *J* = 7.4 Hz, 1H), 6.53 (d, *J* = 7.5 Hz, 1H), 4.72 (d, *J* = 10.0 Hz, 1H), 4.41 (td, *J* = 10.2, 6.6 Hz, 1H), 3.96 (app. pent, *J* = 6.0 Hz, 1H), 3.54 (s, 3H), 2.40 (t, *J* = 7.0 Hz, 1H), 2.34 (tt, *J* = 10.8, 6.6 Hz, 1H), 1.92 (dt, *J* = 11.8, 6.0 Hz, 1H), 1.87 (dt, *J* = 12.0, 6.5 Hz, 1H), 1.66 (app. nonet, *J* = 6.8 Hz, 1H).

**{<sup>1</sup>H}<sup>13</sup>C NMR** (151 MHz, DMSO-*d*<sub>6</sub>) δ: 178.7, 177.1, 170.7, 143.2, 129.9, 128.3, 127.6, 126.5, 123.9, 122.9, 121.3, 121.2, 109.6, 108.9, 75.0, 64.9, 60.6, 53.6, 51.6, 49.3, 28.7, 26.2.

**HRMS** (ESI): *m/z* calcd. for C<sub>23</sub>H<sub>22</sub>N<sub>3</sub>O<sub>4</sub><sup>+</sup> [*M*+*H*] 404.1606 measured 404.1606 Δ = 0.0 mDa.

**FTIR** (ATR, cm<sup>-1</sup>): 3388, 2164, 1724, 1706, 1618, 1541, 1472, 1321, 1197, 118, 1037, 755, 688.

**scXRD:**

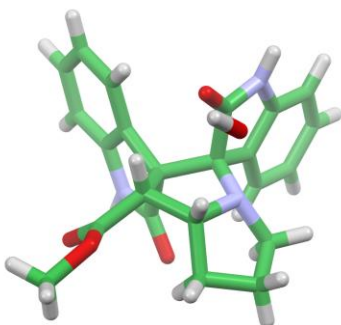

### 3 NMR data for Isatindingotindoline C

#### 3.1 <sup>13</sup>C Data

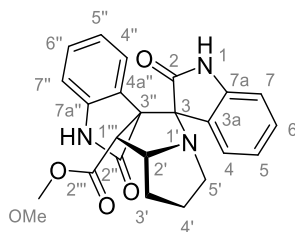

**Table S1.** <sup>13</sup>C NMR data

| Shift for isolated (ppm) | Shift for synthetic (ppm) | DEPT-135        | Carbon           | Δ (ppm) |
|--------------------------|---------------------------|-----------------|------------------|---------|
| 178.7                    | 178.7                     | –               | 2''              | 0       |
| 177.1                    | 177.1                     | –               | 2                | 0       |
| 170.7                    | 170.7                     | –               | 2'''             | 0       |
| 143.2                    | 143.2                     | –               | 7''a             | 0       |
| 129.9                    | 129.9                     | CH              | 6                | 0       |
| 128.3                    | 128.3                     | CH              | 6''              | 0       |
| 127.6                    | 127.6                     | CH              | 4                | 0       |
| 122.8                    | 122.9                     | –               | 3a               | 0.1     |
| 123.9                    | 123.9                     | CH              | 4''              | 0       |
| 121.2                    | 121.3                     | CH              | 5                | 0       |
| 121.1                    | 121.2                     | CH              | 5''              | 0.1     |
| 109.5                    | 109.6                     | CH              | 7                | 0.1     |
| 108.9                    | 108.9                     | CH              | 7''              | 0       |
| 75.0                     | 75.0                      | –               | 3                | 0       |
| 64.8                     | 64.9                      | CH              | 2'               | 0.1     |
| 60.6                     | 60.6                      | –               | 3''              | 0       |
| 53.6                     | 53.6                      | CH              | 1'''             | 0       |
| 51.5                     | 51.6                      | CH <sub>3</sub> | OCH <sub>3</sub> | 0.1     |
| 49.3                     | 49.3                      | CH <sub>2</sub> | 5'               | 0       |
| 28.7                     | 28.7                      | CH <sub>2</sub> | 3'               | 0       |
| 26.1                     | 26.2                      | CH <sub>2</sub> | 4'               | 0.1     |

## 3.2 <sup>1</sup>H Data

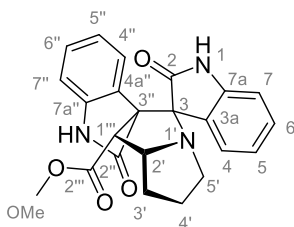

**Table S2.** <sup>1</sup>H NMR data

| Shift for isolated (ppm) | Shift for synthetic (ppm) | Integral | Multiplicity                    | Hydrogen | Δ (ppm) |
|--------------------------|---------------------------|----------|---------------------------------|----------|---------|
| 10.38                    | 10.37                     | 1        | s                               | 1''      | 0.01    |
| 10.33                    | 10.31                     | 1        | s                               | 1        | 0.02    |
| 7.54                     | 7.54                      | 1        | d ( <i>J</i> = 7.5 Hz)          | 4        | 0.00    |
| 7.19                     | 7.19                      | 1        | d ( <i>J</i> = 7.5 Hz)          | 4''      | 0.00    |
| 7.15                     | 7.15                      | 1        | td ( <i>J</i> = 7.7, 1.1 Hz)    | 6        | 0.00    |
| 7.01                     | 7.01                      | 1        | td ( <i>J</i> = 7.7, 1.1 Hz)    | 6''      | 0.00    |
| 6.91                     | 6.91                      | 1        | td ( <i>J</i> = 7.7, 1.1 Hz)    | 5        | 0.00    |
| 6.80                     | 6.79                      | 1        | td ( <i>J</i> = 7.6, 0.9 Hz)    | 5''      | 0.01    |
| 6.60                     | 6.60                      | 1        | d ( <i>J</i> = 7.4 Hz)          | 7        | 0.00    |
| 6.53                     | 6.53                      | 1        | d ( <i>J</i> = 7.5 Hz)          | 7''      | 0.00    |
| 4.73                     | 4.72                      | 1        | d ( <i>J</i> = 10.0 Hz)         | 1'''     | 0.01    |
| 4.41                     | 4.41                      | 1        | td ( <i>J</i> = 10.2, 6.6 Hz)   | 2'       | 0.00    |
| 3.96                     | 3.96                      | 1        | app. pent ( <i>J</i> = 6.0 Hz)  | 5'       | 0.00    |
| 3.54                     | 3.54                      | 3        | s                               | OMe      | 0.00    |
| 2.40                     | 2.40                      | 1        | t ( <i>J</i> = 7.0 Hz)          | 5'       | 0.00    |
| 2.33                     | 2.34                      | 1        | tt ( <i>J</i> = 10.8, 6.6 Hz)   | 3'       | -0.01   |
| 1.92                     | 1.92                      | 1        | dt ( <i>J</i> = 11.8, 6.0 Hz)   | 4'       | 0.00    |
| 1.87                     | 1.87                      | 1        | dt ( <i>J</i> = 12.0, 6.5 Hz)   | 3'       | 0.00    |
| 1.66                     | 1.66                      | 1        | app. nonet ( <i>J</i> = 6.8 Hz) | 4'       | 0.00    |

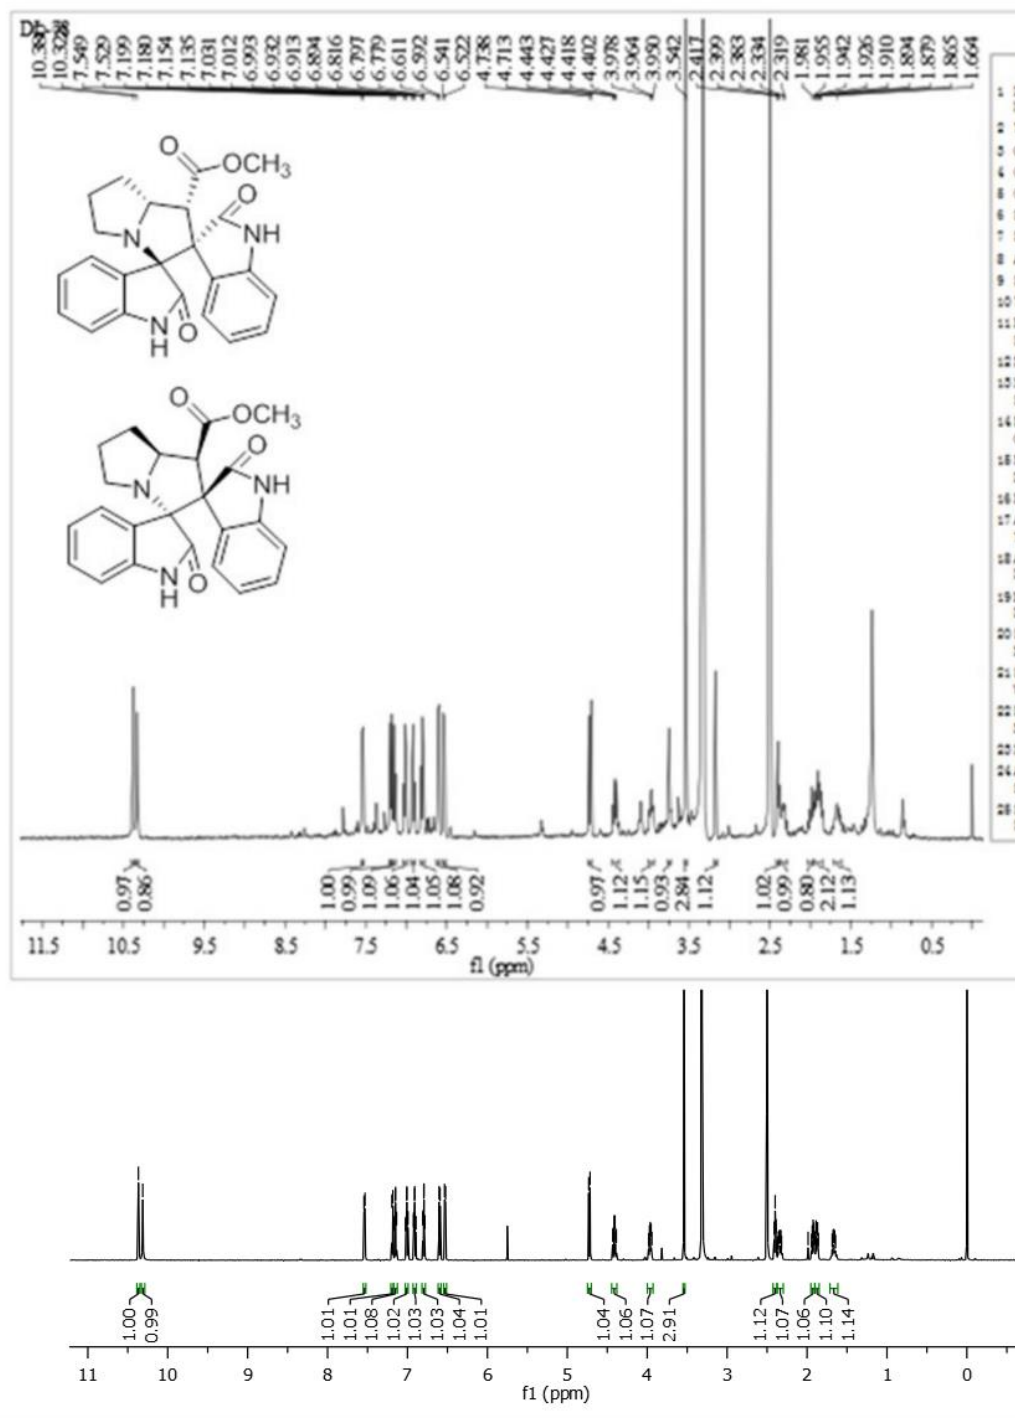

**Figure S1.**  $^1\text{H}$  NMR spectral overlay of natural and synthetic Isatindigotindoline C.



## 4 Computational details

For all stationary points a systematic rotor conformer search was carried out with UFF force-field as implemented in Avogadro 1.2.0. Obtained minimum energy conformers were optimized with B97D3/DEF2SVP level of theory using def2/j Weigend J auxiliary basis set as implemented in ORCA 4.0.0. Final geometry optimizations and free energies were obtained using with B97D3/DEF2TZVP level of theory using Weigend J auxiliary basis set, and a final grid size of 5 with the tightscf parameter.

## 5 Coordinates

### 5.1 Isatindigotindoline C

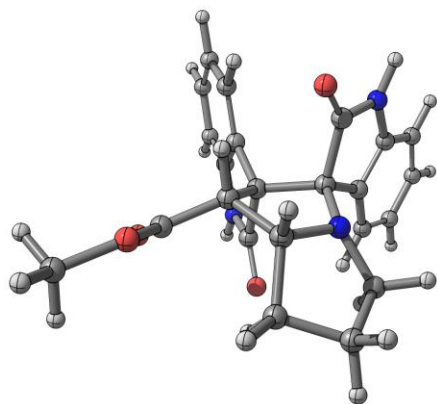

51

Coordinates from ORCA-job nat\_final

|   |                   |                   |                   |
|---|-------------------|-------------------|-------------------|
| C | -2.48764444095788 | 1.03156863048140  | -1.58787508920952 |
| C | -3.76804176573853 | 1.12148354768916  | -2.11788813409887 |
| C | -1.61448811973856 | -0.02366717647897 | -1.90669401485866 |
| C | -2.02718549159150 | -0.99943912840365 | -2.80364831119877 |
| O | 0.24740995913404  | 2.18717164905163  | 0.21197414853197  |
| C | -0.53665550278612 | 1.54860643640660  | -0.46734406917643 |
| C | -0.32354185659614 | 0.16604399242114  | -1.14624016524127 |
| C | -0.03872611658049 | -0.92629974097091 | -0.01639846908968 |
| C | 0.98188290338302  | 0.06808346424324  | -1.95365822027479 |
| C | 2.09690687572008  | -0.35142429686492 | -0.94174970904335 |
| N | 1.37992666388411  | -0.83795357927322 | 0.25621760249698  |
| C | 3.06323605829104  | 0.71700747686530  | -0.41218512098974 |
| C | 3.30703777139858  | 0.25615489722386  | 1.03179240781880  |
| C | 1.92346770172678  | -0.22759158695803 | 1.47859973471150  |
| C | -3.31653686771693 | -0.92527879904928 | -3.35136753145918 |
| C | -4.17530964985978 | 0.11914066400345  | -3.00693537256016 |
| N | -1.84243400138935 | 1.90911320519815  | -0.71612598919633 |

|   |                   |                   |                   |
|---|-------------------|-------------------|-------------------|
| C | -0.99960867696644 | -0.91134136832287 | 1.15789503858012  |
| C | -1.71172621413040 | -2.12452519052004 | 1.17620953029781  |
| N | -1.27488451383403 | -2.94583300248962 | 0.13364580935149  |
| C | -0.29351150294669 | -2.35753120826287 | -0.62804831726933 |
| C | -1.29499841159464 | 0.05382430290607  | 2.11331933570470  |
| C | -2.28126888442042 | -0.20573345377809 | 3.07534003479461  |
| C | -2.97174779920777 | -1.41740294088789 | 3.07600004555465  |
| C | -2.69568562391146 | -2.39867941179301 | 2.11770880874760  |
| O | 0.27912915122470  | -2.87472920348674 | -1.56875461163584 |
| C | 1.27918689816373  | 1.28045963182690  | -2.80271891781874 |
| O | 0.57167188876918  | 2.25583755704392  | -2.92806237895537 |
| O | 2.45425853531462  | 1.11439879749716  | -3.46165945250141 |
| C | 2.84786897958218  | 2.21255388274519  | -4.31267070756936 |
| H | -4.42844986967605 | 1.94500217332215  | -1.86027187262415 |
| H | -1.36323611889979 | -1.81220876613181 | -3.07869939612160 |
| H | 0.86153232967929  | -0.76788108764489 | -2.64912360231310 |
| H | 2.66139952078893  | -1.17272372327837 | -1.39813996676596 |
| H | 2.57762510101381  | 1.69621786746817  | -0.40823763495140 |
| H | 3.97679955728710  | 0.77540687489064  | -1.00870130198020 |
| H | 4.02547561499873  | -0.57219971550427 | 1.05310988367946  |
| H | 3.68657088574524  | 1.05451179388700  | 1.67596271191171  |
| H | 1.33005419731789  | 0.62517123899528  | 1.82040044569304  |
| H | 1.97327737623107  | -0.96570307451952 | 2.28737686954835  |
| H | -3.64533078553721 | -1.68626676699120 | -4.05338086028396 |
| H | -5.17158034366256 | 0.16455761815893  | -3.43870461867947 |
| H | -2.20821640308932 | 2.79995302056180  | -0.41482826773081 |
| H | -1.59502891068009 | -3.88877021744706 | -0.03389236983534 |
| H | -0.77598461104864 | 1.00446476163967  | 2.11838799104178  |
| H | -2.50728043381055 | 0.54664390165200  | 3.82540169743944  |
| H | -3.73519492550236 | -1.60562380178763 | 3.82613573866062  |
| H | -3.23436175712318 | -3.34227309594299 | 2.10903921744502  |
| H | 3.79986230652259  | 1.91093301199072  | -4.75113154477604 |
| H | 2.09798223981713  | 2.38022915305873  | -5.09094640190539 |
| H | 2.96467708300301  | 3.12653078555958  | -3.72334463189543 |

## 5.2 *epi*-Isatindigotindoline C

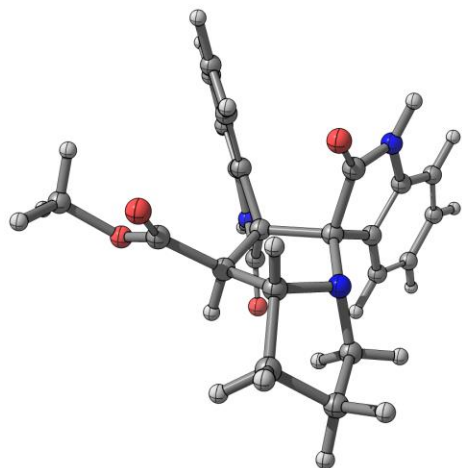

51

Coordinates from ORCA-job epi\_final

|   |                   |                   |                   |
|---|-------------------|-------------------|-------------------|
| C | -2.54642795075778 | 0.69162187159460  | -1.83856325391282 |
| C | -3.74830410199100 | 0.51370410544914  | -2.51039259295668 |
| C | -1.39938409293753 | -0.07104817183532 | -2.12627796007731 |
| C | -1.44966391921773 | -1.00674372081122 | -3.15218567312242 |
| O | -0.33603945195694 | 2.42166199188609  | 0.19527172484187  |
| C | -0.90227073357746 | 1.60313025804261  | -0.50807347131804 |
| C | -0.28875083325030 | 0.35521867091763  | -1.19147722257917 |
| C | 0.08493143079066  | -0.77129576369257 | -0.04466460346766 |
| C | 1.11537553957682  | 0.70001309311573  | -1.76092485659778 |
| C | 2.11134816764411  | -0.31487996676388 | -1.14089840859476 |
| N | 1.50968785881534  | -0.68661143986798 | 0.15293283597821  |
| C | 3.49742116948132  | 0.26166718534503  | -0.79308622315863 |
| C | 3.55630692213896  | 0.23519811800172  | 0.75217202889848  |
| C | 2.08686659597493  | 0.20393491876179  | 1.17308343071457  |
| C | -2.65150586565409 | -1.19252138571053 | -3.85047575708090 |
| C | -3.78744424094246 | -0.45030728658067 | -3.52555354762404 |
| N | -2.23573338421627 | 1.63046321892081  | -0.84934424924229 |
| C | -0.81439989259951 | -0.74455573591444 | 1.17590049431149  |
| C | -1.62328898925218 | -1.89592365880881 | 1.16627875618418  |
| N | -1.27734324506358 | -2.70457702218432 | 0.08232785412088  |
| C | -0.21830633139219 | -2.19748350236000 | -0.63905478024476 |
| C | -0.97366025672311 | 0.18010507682072  | 2.20097478907694  |
| C | -1.93825314601942 | -0.04854725208443 | 3.19229626860920  |

|   |                   |                   |                   |
|---|-------------------|-------------------|-------------------|
| C | -2.73910396383051 | -1.18991241909688 | 3.15494901537301  |
| C | -2.59044099348887 | -2.13555735273453 | 2.13443167018860  |
| O | 0.36205671609114  | -2.77670020984147 | -1.53347483562985 |
| C | 1.15013580306589  | 0.76690646498628  | -3.27152817923108 |
| O | 1.71088887584851  | -0.01199023691565 | -4.00835950507807 |
| O | 0.44354156749899  | 1.84299806077463  | -3.70580283823796 |
| C | 0.28858887174076  | 1.94773566679111  | -5.13712772423489 |
| H | -4.62314728792524 | 1.11151543686485  | -2.26914471167955 |
| H | -0.57316132948942 | -1.58935308775607 | -3.40737843889491 |
| H | 1.35321280696675  | 1.70097083257010  | -1.38432545479092 |
| H | 2.16909277598013  | -1.18854825363496 | -1.78995097702965 |
| H | 3.58929314866231  | 1.28509157293555  | -1.17232081242046 |
| H | 4.30214366017025  | -0.32338350705464 | -1.24438675815070 |
| H | 4.05611972470586  | -0.67724651958375 | 1.09376404844994  |
| H | 4.08790206195982  | 1.09374472804635  | 1.17279648445791  |
| H | 1.65889207253833  | 1.21704119589417  | 1.14316291055781  |
| H | 1.93223363313872  | -0.21347496311254 | 2.17160715012357  |
| H | -2.69448430880512 | -1.92403430049609 | -4.65238218973950 |
| H | -4.71352174755686 | -0.61047500973331 | -4.07136722064279 |
| H | -2.84629965697010 | 2.37364476372387  | -0.54372282291494 |
| H | -1.63139033471567 | -3.63598718839891 | -0.08041362882471 |
| H | -0.37465036128586 | 1.08088761486768  | 2.23004094609543  |
| H | -2.06062675340287 | 0.67327661948830  | 3.99462063555033  |
| H | -3.48578694198336 | -1.35343180531920 | 3.92753379344961  |
| H | -3.20558120355163 | -3.03073466993797 | 2.10401770371670  |
| H | -0.28902416892168 | 2.85836979557320  | -5.30028789410326 |
| H | 1.26447339994141  | 2.01383255482546  | -5.62605352523288 |
| H | -0.25020731525228 | 1.07574061403276  | -5.51923242388536 |

## 6 X-ray Crystallography

Diffraction data were collected on a Bruker APEX II with graphite-monochromated Mo K $\alpha$  radiation ( $\lambda = 0.71073 \text{ \AA}$ ). The cell parameters were obtained from the least-squares refinement of the spots (from 60 collected frames) using the Apex 2 program. Data collection, data processing, and structure solution were performed using the Apex 2 program. Initial atomic positions were located using intrinsic phasing and the structures were refined by least-squares methods using SHELXL-2017. Calculated hydrogen positions were input and refined in a riding manner along with the attached carbons. The *epi-1* crystal was solvated with disordered acetone and the SQUEEZE program was used to treat the reflections from the solvent as diffuse scattering.

**Table S3.** Crystal data and structure refinement for C<sub>23</sub>H<sub>21</sub>N<sub>3</sub>O<sub>4</sub> (*epi-1*).

|                                   |                                                               |                  |
|-----------------------------------|---------------------------------------------------------------|------------------|
| Identification code               | js1259_0m_a ( <i>epi</i> -Isatinindigotindoline C)            |                  |
| Empirical formula                 | C <sub>23</sub> H <sub>21</sub> N <sub>3</sub> O <sub>4</sub> |                  |
| Formula weight                    | 403.43                                                        |                  |
| Temperature                       | 296(2) K                                                      |                  |
| Wavelength                        | 0.71073 Å                                                     |                  |
| Crystal system                    | Monoclinic                                                    |                  |
| Space group                       | C2/c                                                          |                  |
| Unit cell dimensions              | a = 28.260(5) Å                                               | a = 90°.         |
|                                   | b = 7.7137(14) Å                                              | b = 102.209(3)°. |
|                                   | c = 20.218(4) Å                                               | g = 90°.         |
| Volume                            | 4307.5(13) Å <sup>3</sup>                                     |                  |
| Z                                 | 8                                                             |                  |
| Density (calculated)              | 1.244 Mg/m <sup>3</sup>                                       |                  |
| Absorption coefficient            | 0.087 mm <sup>-1</sup>                                        |                  |
| F(000)                            | 1696                                                          |                  |
| Crystal size                      | 0.250 x 0.200 x 0.100 mm <sup>3</sup>                         |                  |
| Theta range for data collection   | 2.267 to 33.111°.                                             |                  |
| Index ranges                      | -43<=h<=42, -11<=k<=11, -30<=l<=30                            |                  |
| Reflections collected             | 28555                                                         |                  |
| Independent reflections           | 7823 [R(int) = 0.0335]                                        |                  |
| Completeness to theta = 25.000°   | 99.9 %                                                        |                  |
| Absorption correction             | Semi-empirical from equivalents                               |                  |
| Max. and min. transmission        | 0.745 and 0.697                                               |                  |
| Refinement method                 | Full-matrix least-squares on F <sup>2</sup>                   |                  |
| Data / restraints / parameters    | 7823 / 0 / 280                                                |                  |
| Goodness-of-fit on F <sup>2</sup> | 1.039                                                         |                  |
| Final R indices [I>2sigma(I)]     | R1 = 0.0506, wR2 = 0.1346                                     |                  |
| R indices (all data)              | R1 = 0.0986, wR2 = 0.1559                                     |                  |
| Extinction coefficient            | n/a                                                           |                  |
| Largest diff. peak and hole       | 0.237 and -0.195 e.Å <sup>-3</sup>                            |                  |

**Table S4.** Crystal data and structure refinement for C<sub>23</sub>H<sub>21</sub>N<sub>3</sub>O<sub>4</sub>, H<sub>2</sub>O (1).

|                                   |                                                                                  |                   |
|-----------------------------------|----------------------------------------------------------------------------------|-------------------|
| Identification code               | js1266_0m_a (Isatinindigotindoline C)                                            |                   |
| Empirical formula                 | C <sub>23</sub> H <sub>21</sub> N <sub>3</sub> O <sub>4</sub> , H <sub>2</sub> O |                   |
| Formula weight                    | 421.44                                                                           |                   |
| Temperature                       | 100(2) K                                                                         |                   |
| Wavelength                        | 0.71073 Å                                                                        |                   |
| Crystal system                    | Monoclinic                                                                       |                   |
| Space group                       | P2 <sub>1</sub> /n                                                               |                   |
| Unit cell dimensions              | a = 9.0958(6) Å                                                                  | a = 90°.          |
|                                   | b = 15.2107(11) Å                                                                | b = 92.6250(10)°. |
|                                   | c = 14.0883(10) Å                                                                | g = 90°.          |
| Volume                            | 1947.1(2) Å <sup>3</sup>                                                         |                   |
| Z                                 | 4                                                                                |                   |
| Density (calculated)              | 1.438 Mg/m <sup>3</sup>                                                          |                   |
| Absorption coefficient            | 0.103 mm <sup>-1</sup>                                                           |                   |
| F(000)                            | 888                                                                              |                   |
| Crystal size                      | 0.150 x 0.100 x 0.050 mm <sup>3</sup>                                            |                   |
| Theta range for data collection   | 1.971 to 30.659°.                                                                |                   |
| Index ranges                      | -12<=h<=12, -21<=k<=21, -20<=l<=20                                               |                   |
| Reflections collected             | 23822                                                                            |                   |
| Independent reflections           | 5989 [R(int) = 0.0346]                                                           |                   |
| Completeness to theta = 25.000°   | 100.0 %                                                                          |                   |
| Absorption correction             | Semi-empirical from equivalents                                                  |                   |
| Max. and min. transmission        | 0.746 and 0.7055                                                                 |                   |
| Refinement method                 | Full-matrix least-squares on F <sup>2</sup>                                      |                   |
| Data / restraints / parameters    | 5989 / 0 / 297                                                                   |                   |
| Goodness-of-fit on F <sup>2</sup> | 1.037                                                                            |                   |
| Final R indices [I>2sigma(I)]     | R1 = 0.0439, wR2 = 0.1154                                                        |                   |
| R indices (all data)              | R1 = 0.0592, wR2 = 0.1256                                                        |                   |
| Extinction coefficient            | n/a                                                                              |                   |
| Largest diff. peak and hole       | 0.437 and -0.224 e.Å <sup>-3</sup>                                               |                   |

## 7 Spectral data





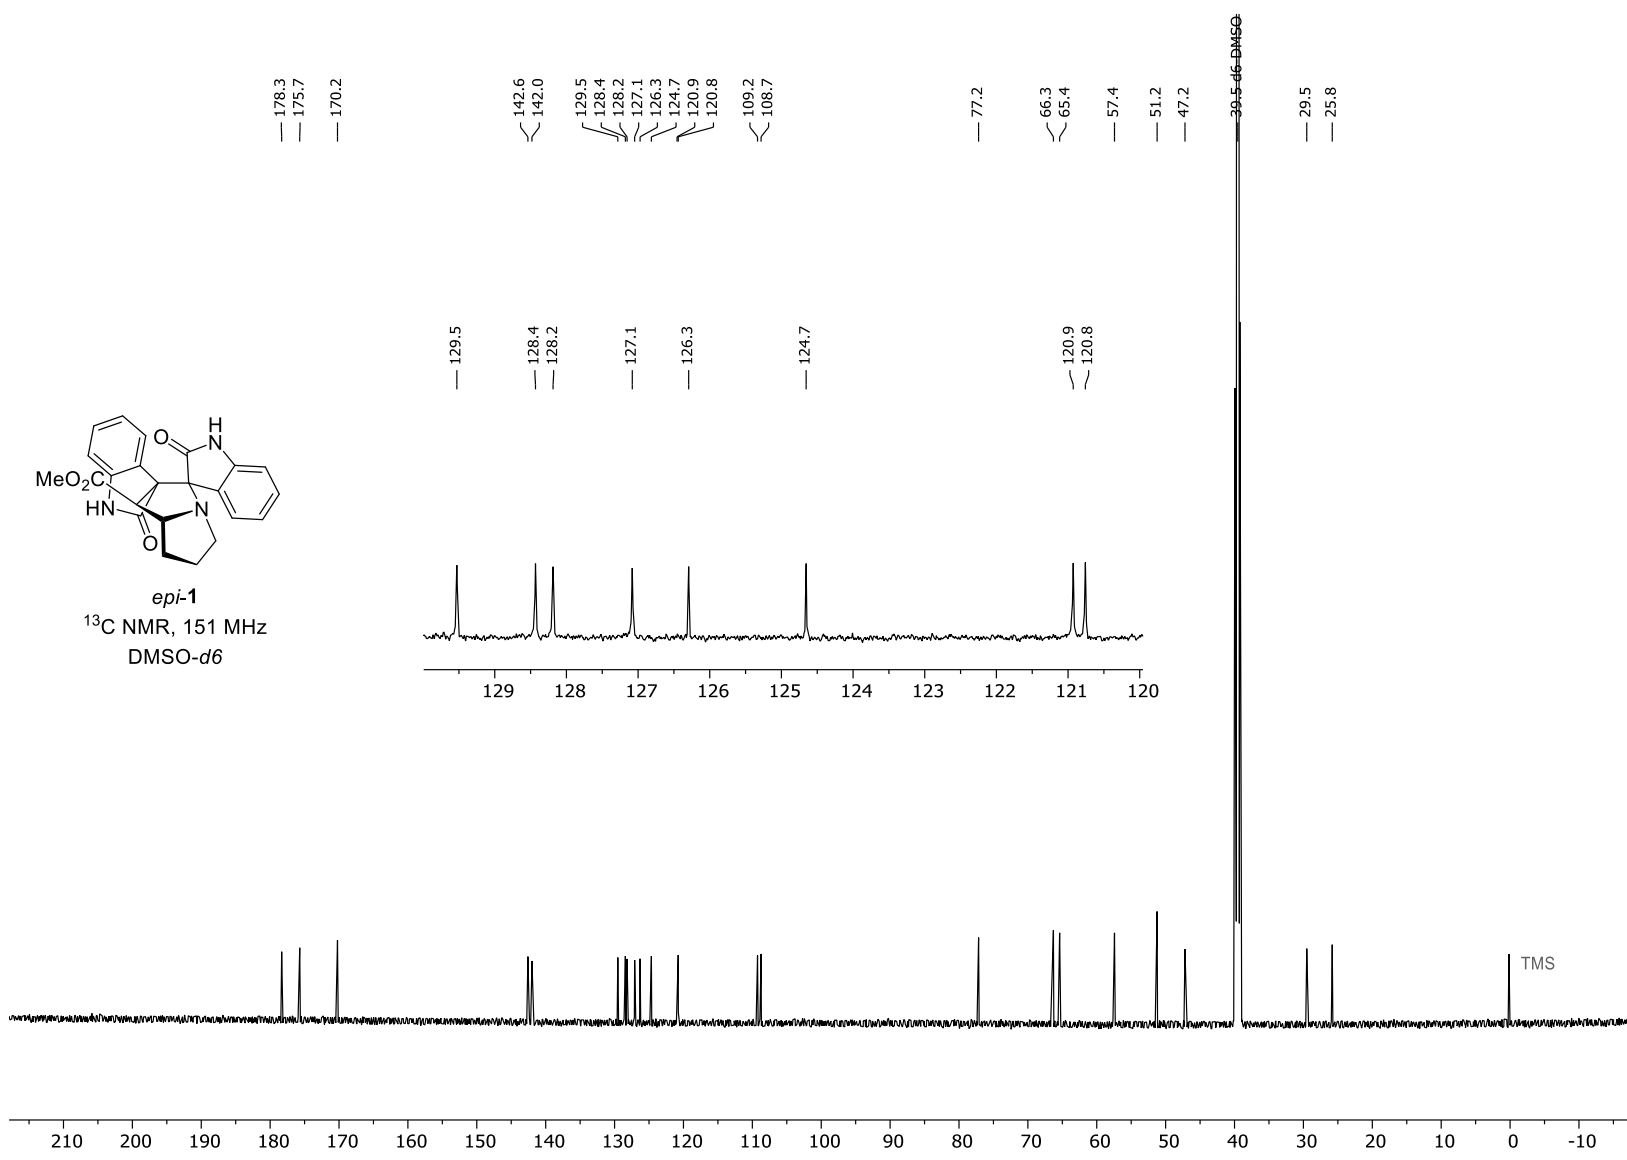

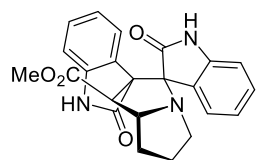

*epi-1*  
DEPT-135, 151 MHz  
DMSO-*d*<sub>6</sub>

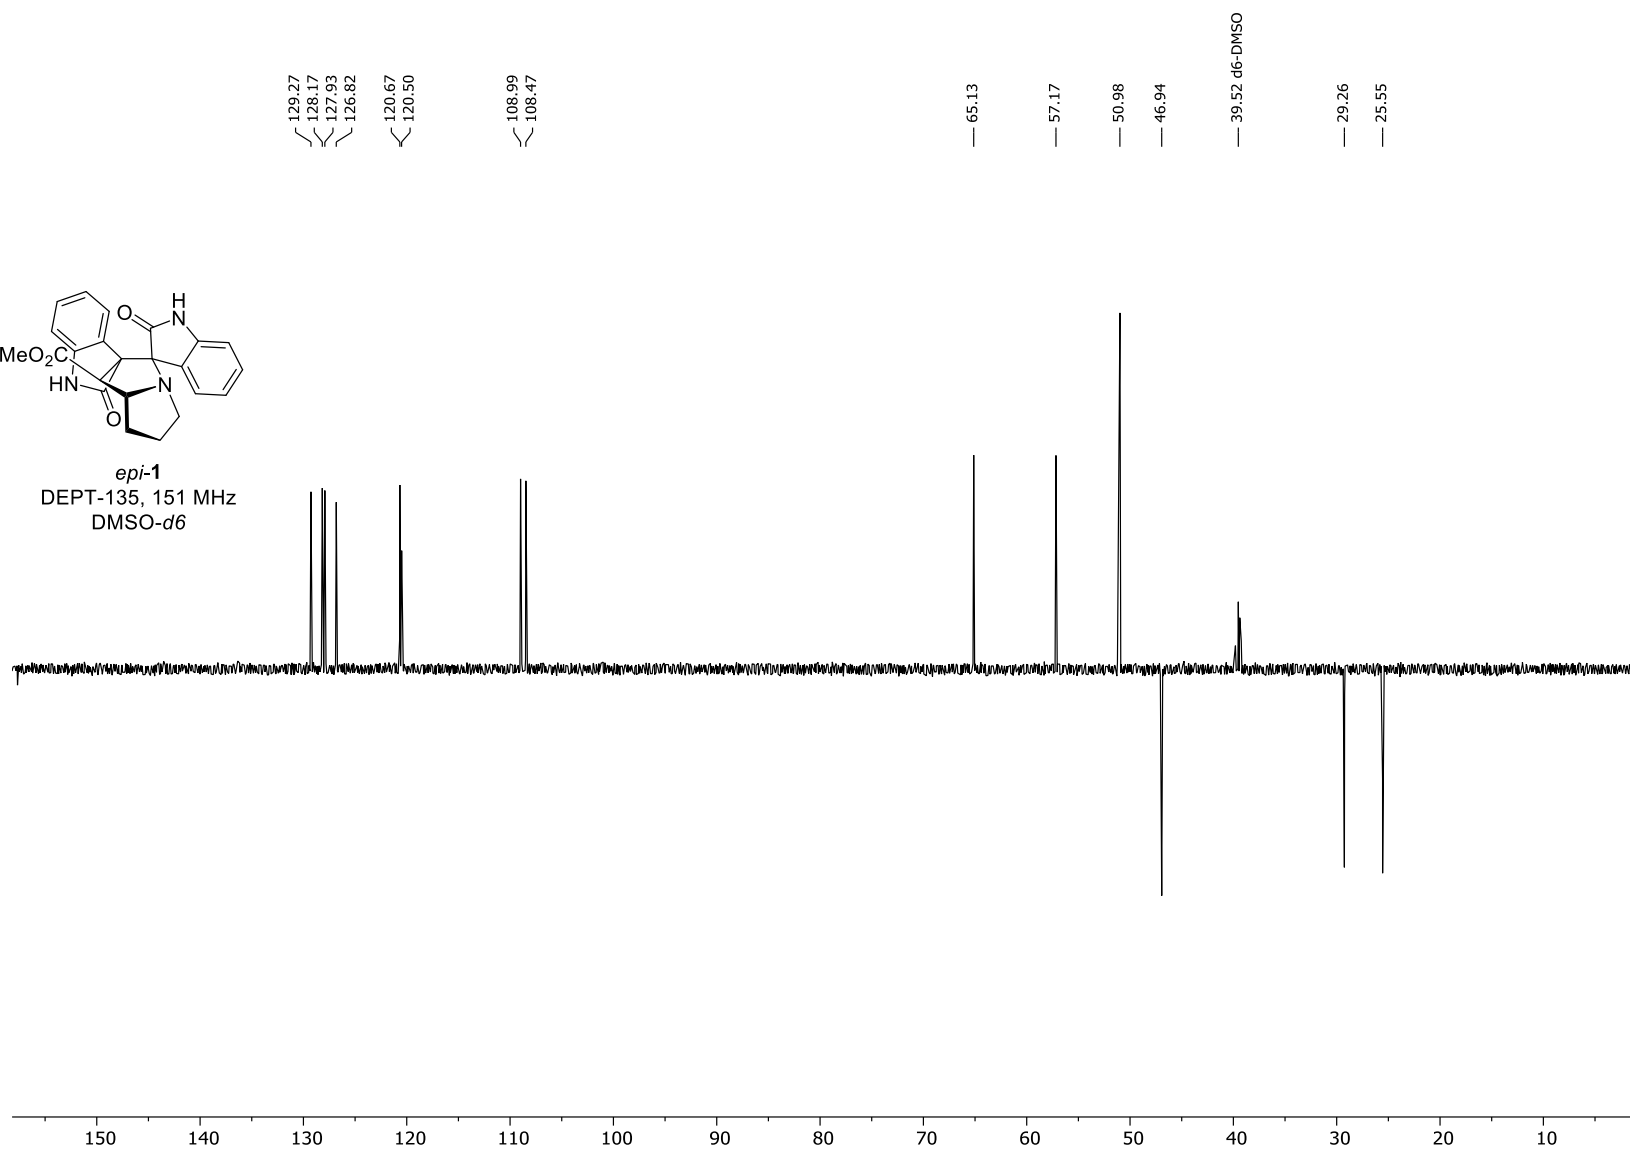

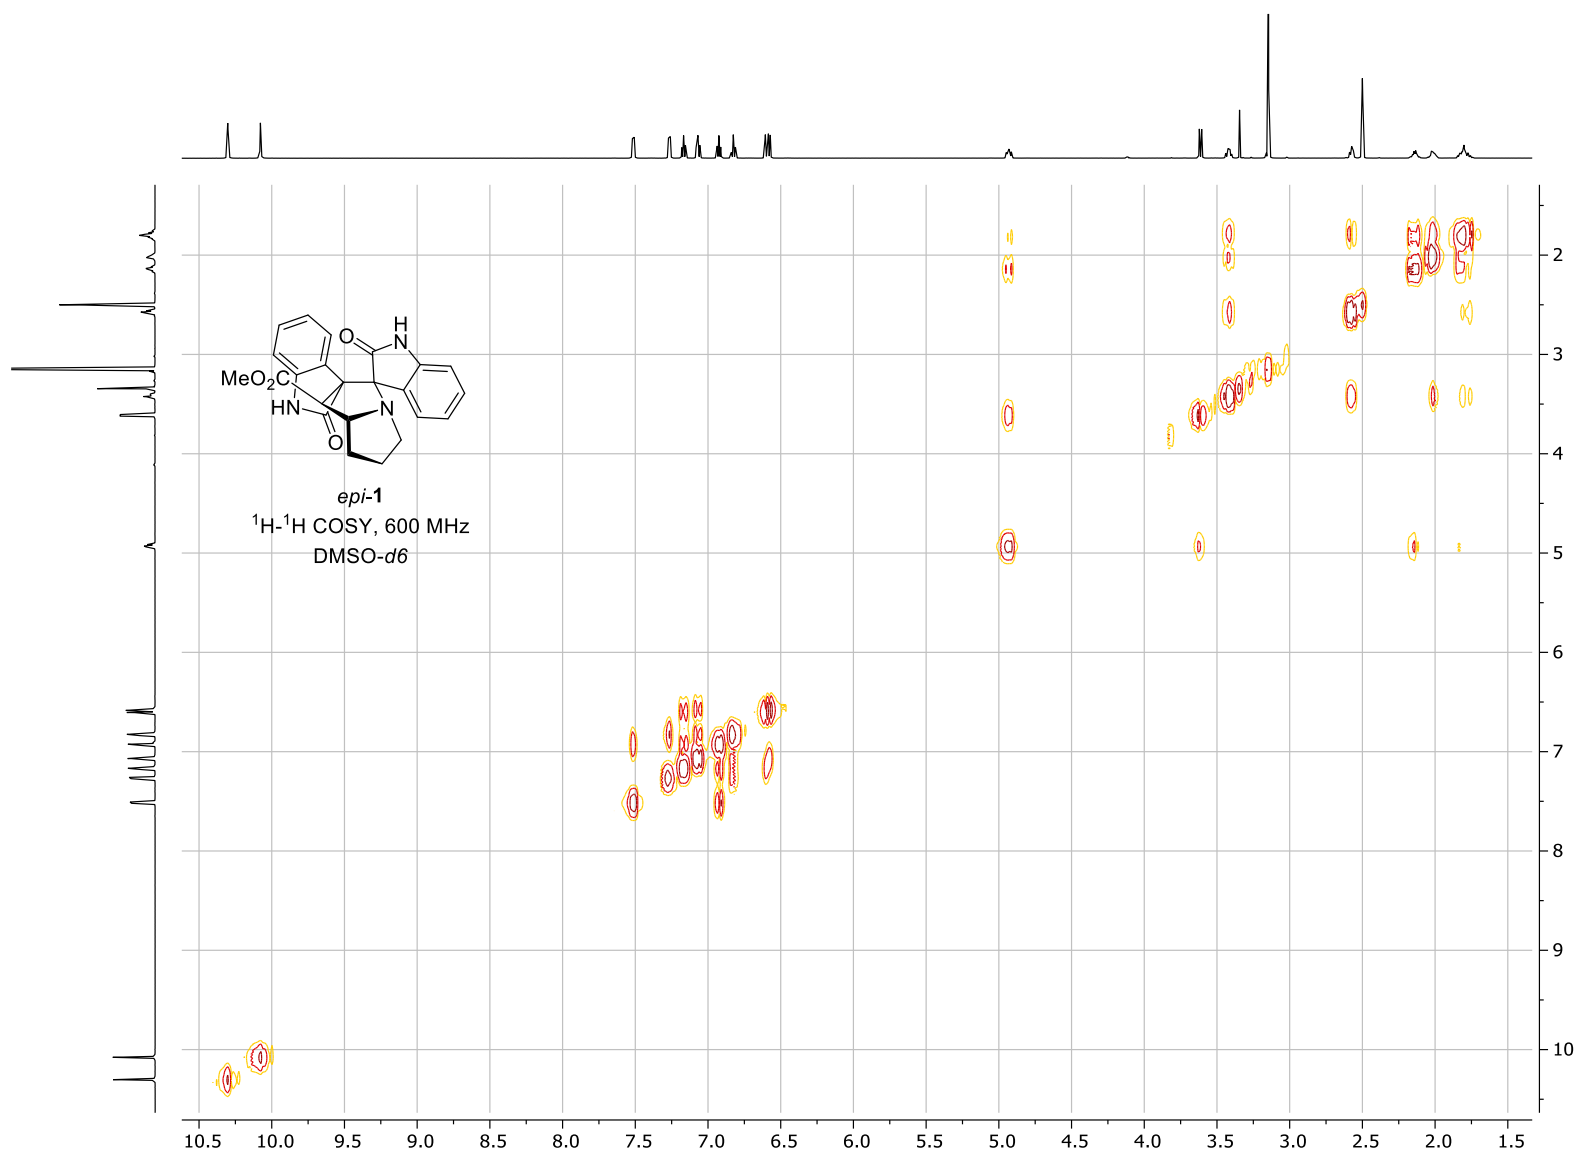

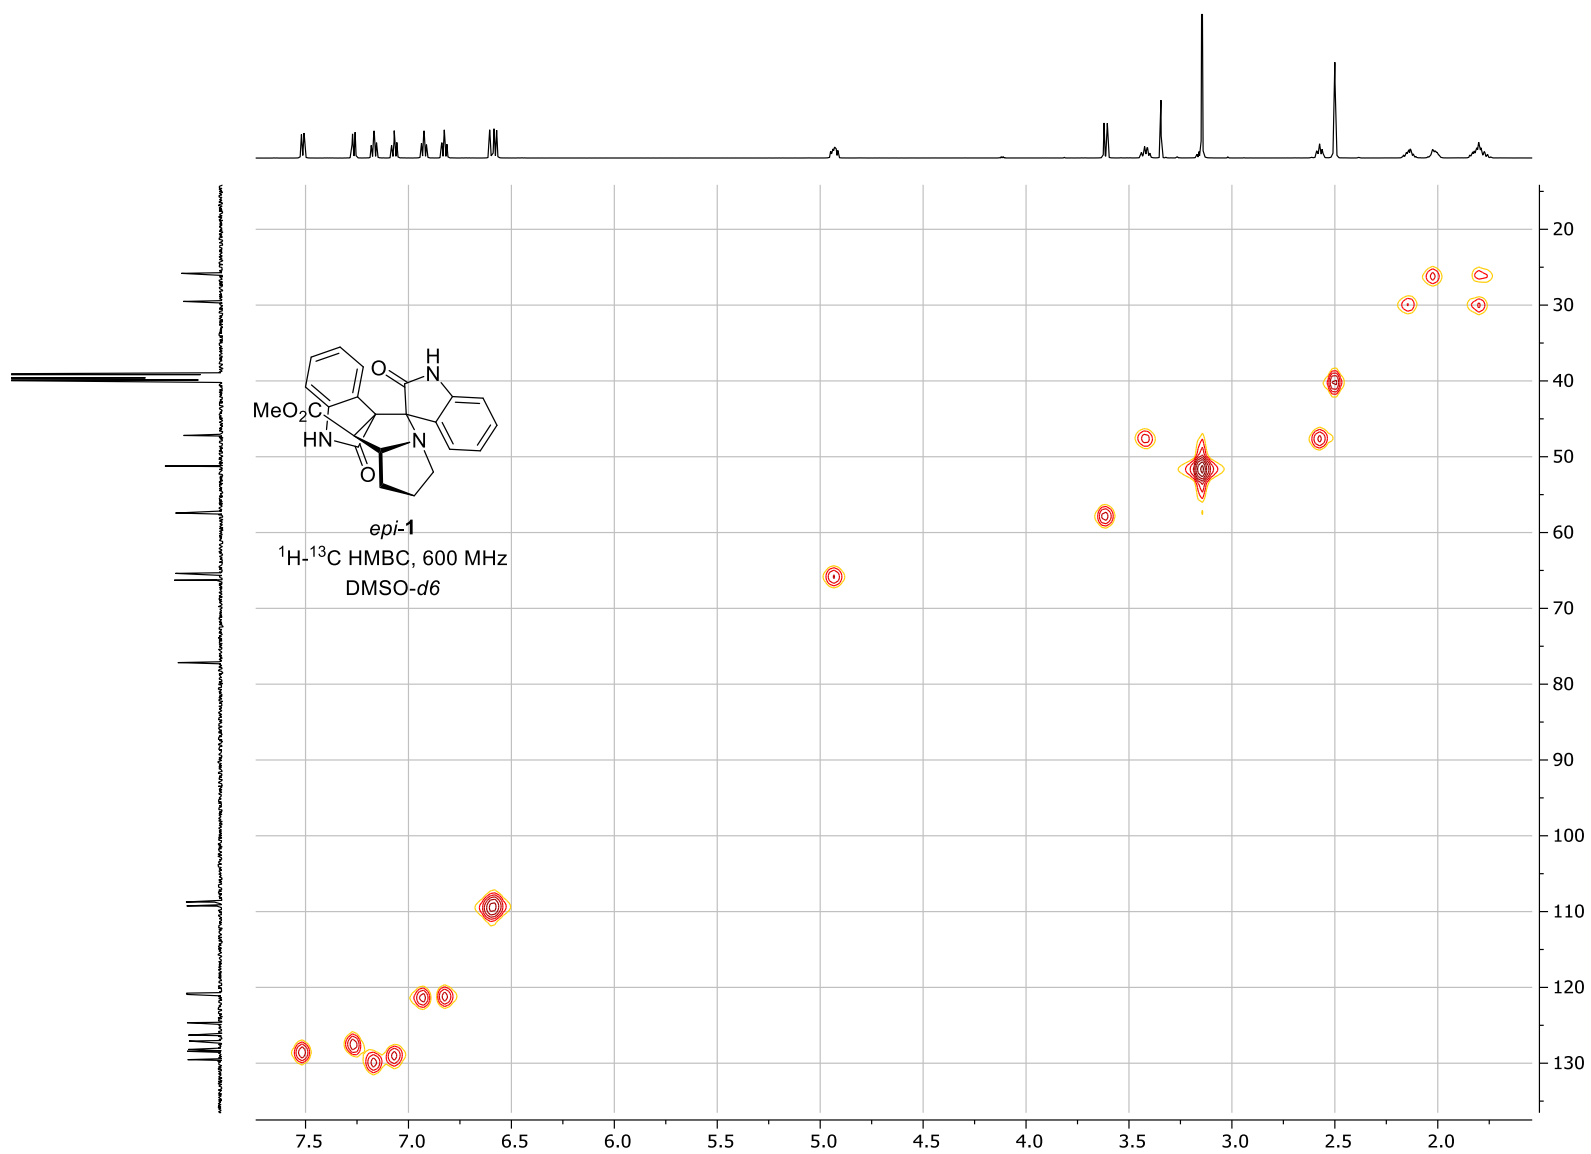

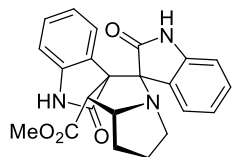

Isatindigotindoline C (1)  
<sup>1</sup>H NMR, 600 MHz  
DMSO-*d*6

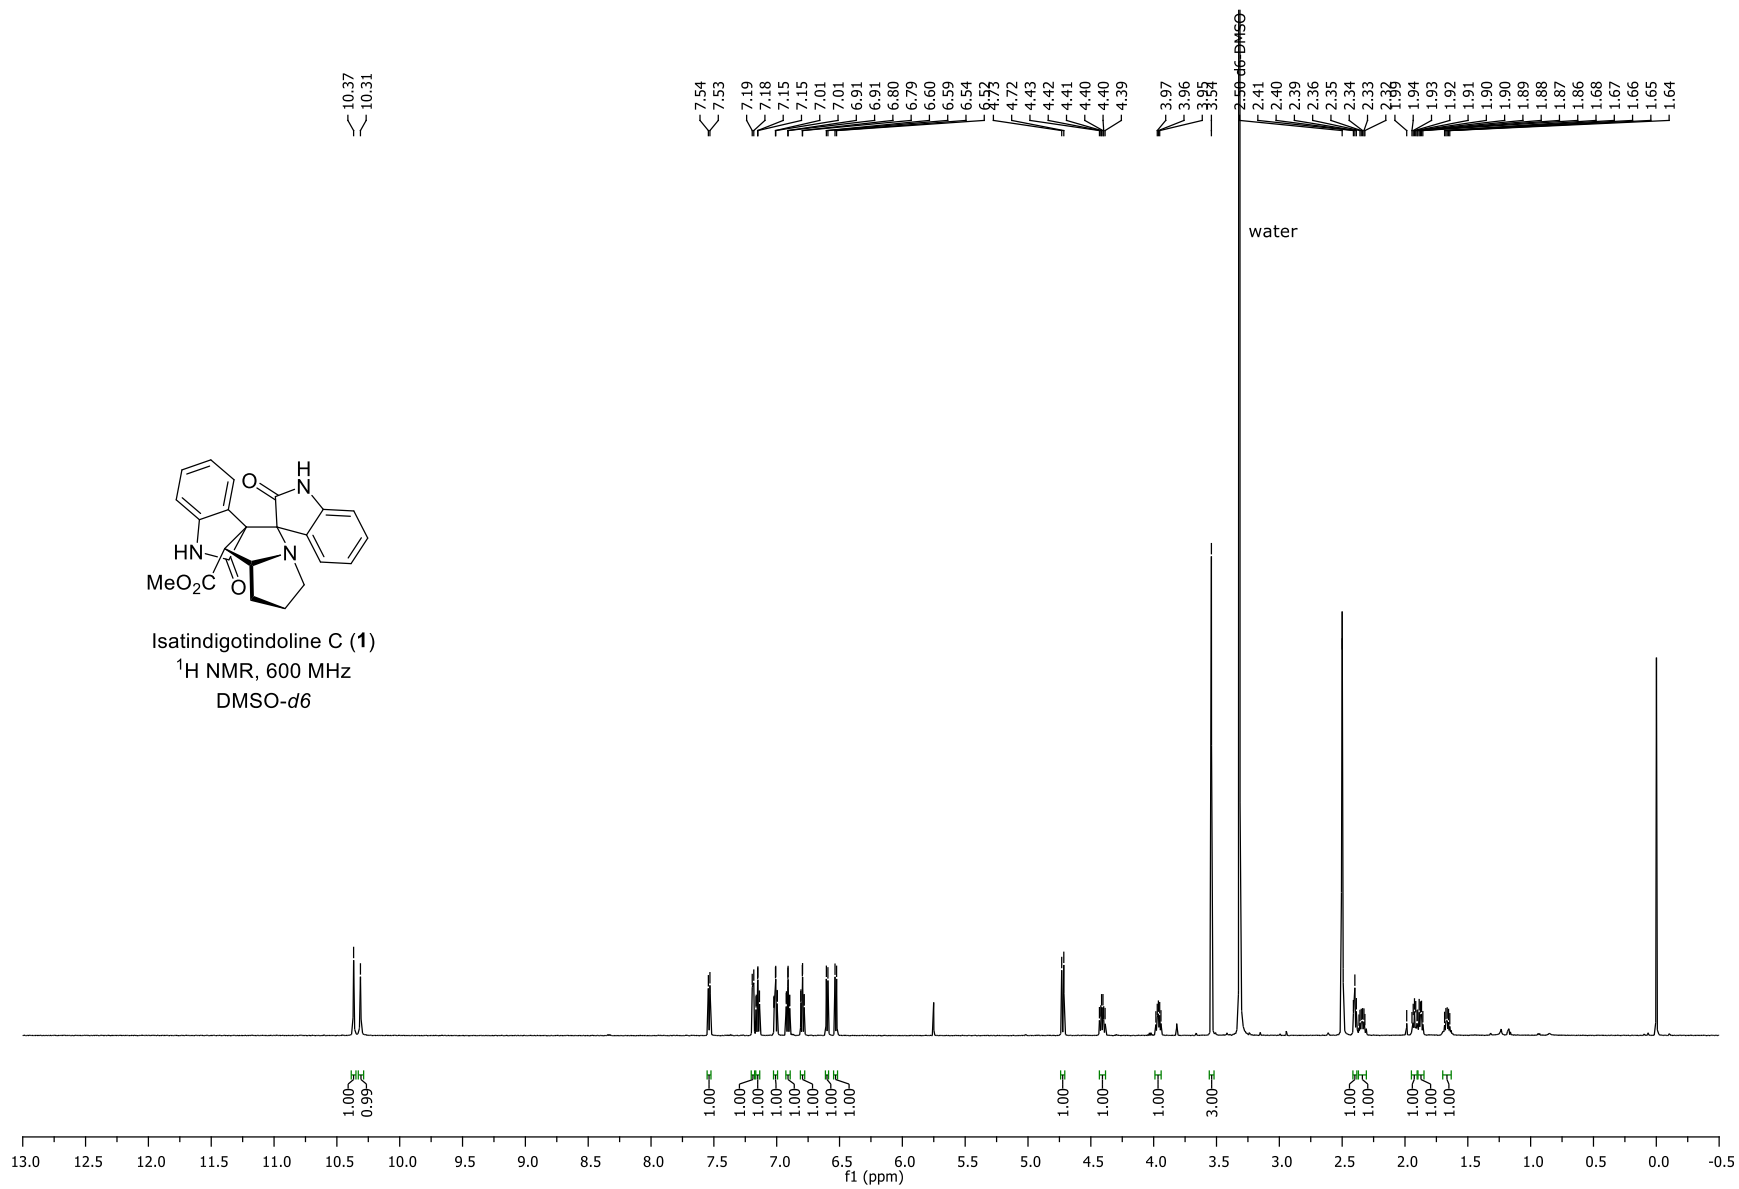

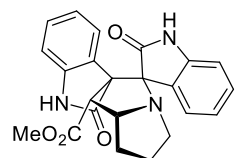

Isatindigotindoline C (1)  
<sup>1</sup>H NMR, 600 MHz  
 DMSO-*d*<sub>6</sub>

Region zoom-ins

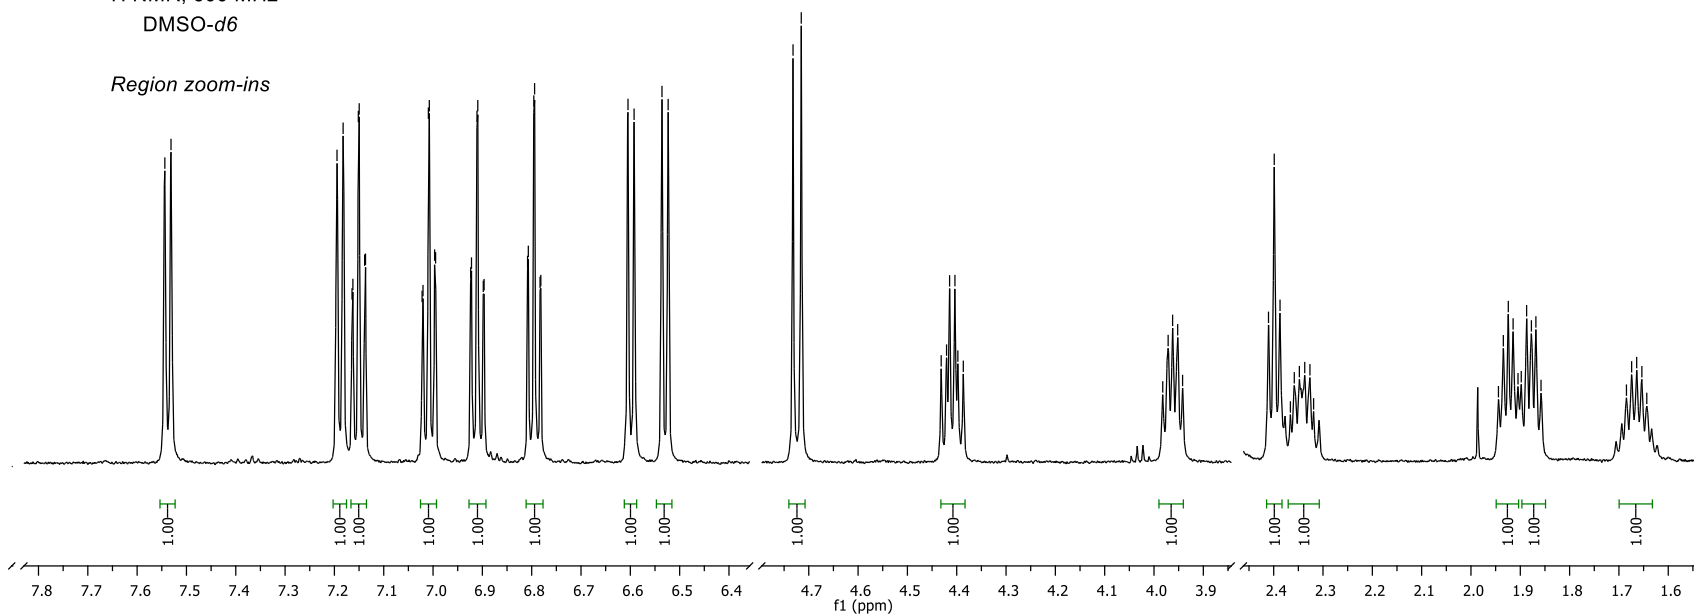

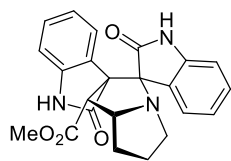

Isatindigotindoline C (1)  
<sup>13</sup>C NMR, 151 MHz  
 DMSO-*d*<sub>6</sub>

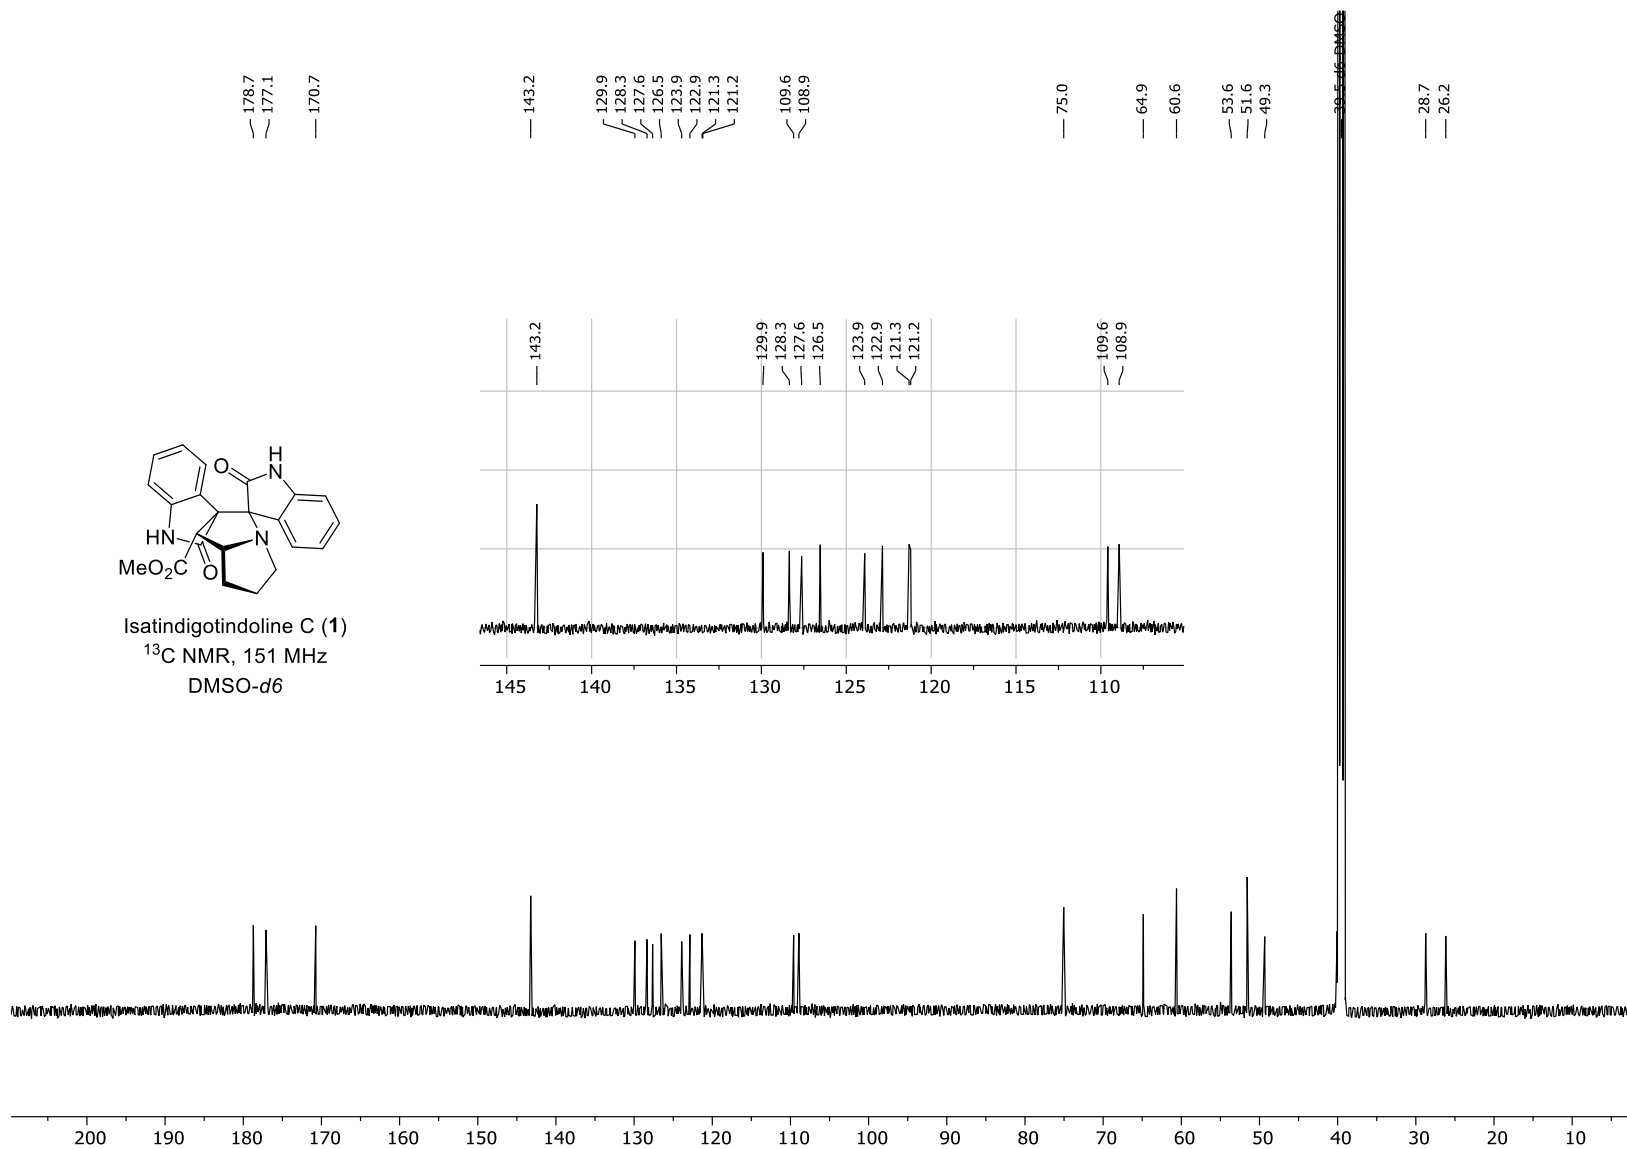



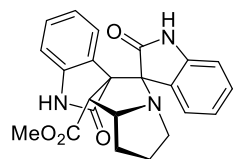

Isatindigotindoline C (1)  
DEPT-135, 151 MHz  
DMSO-*d*6

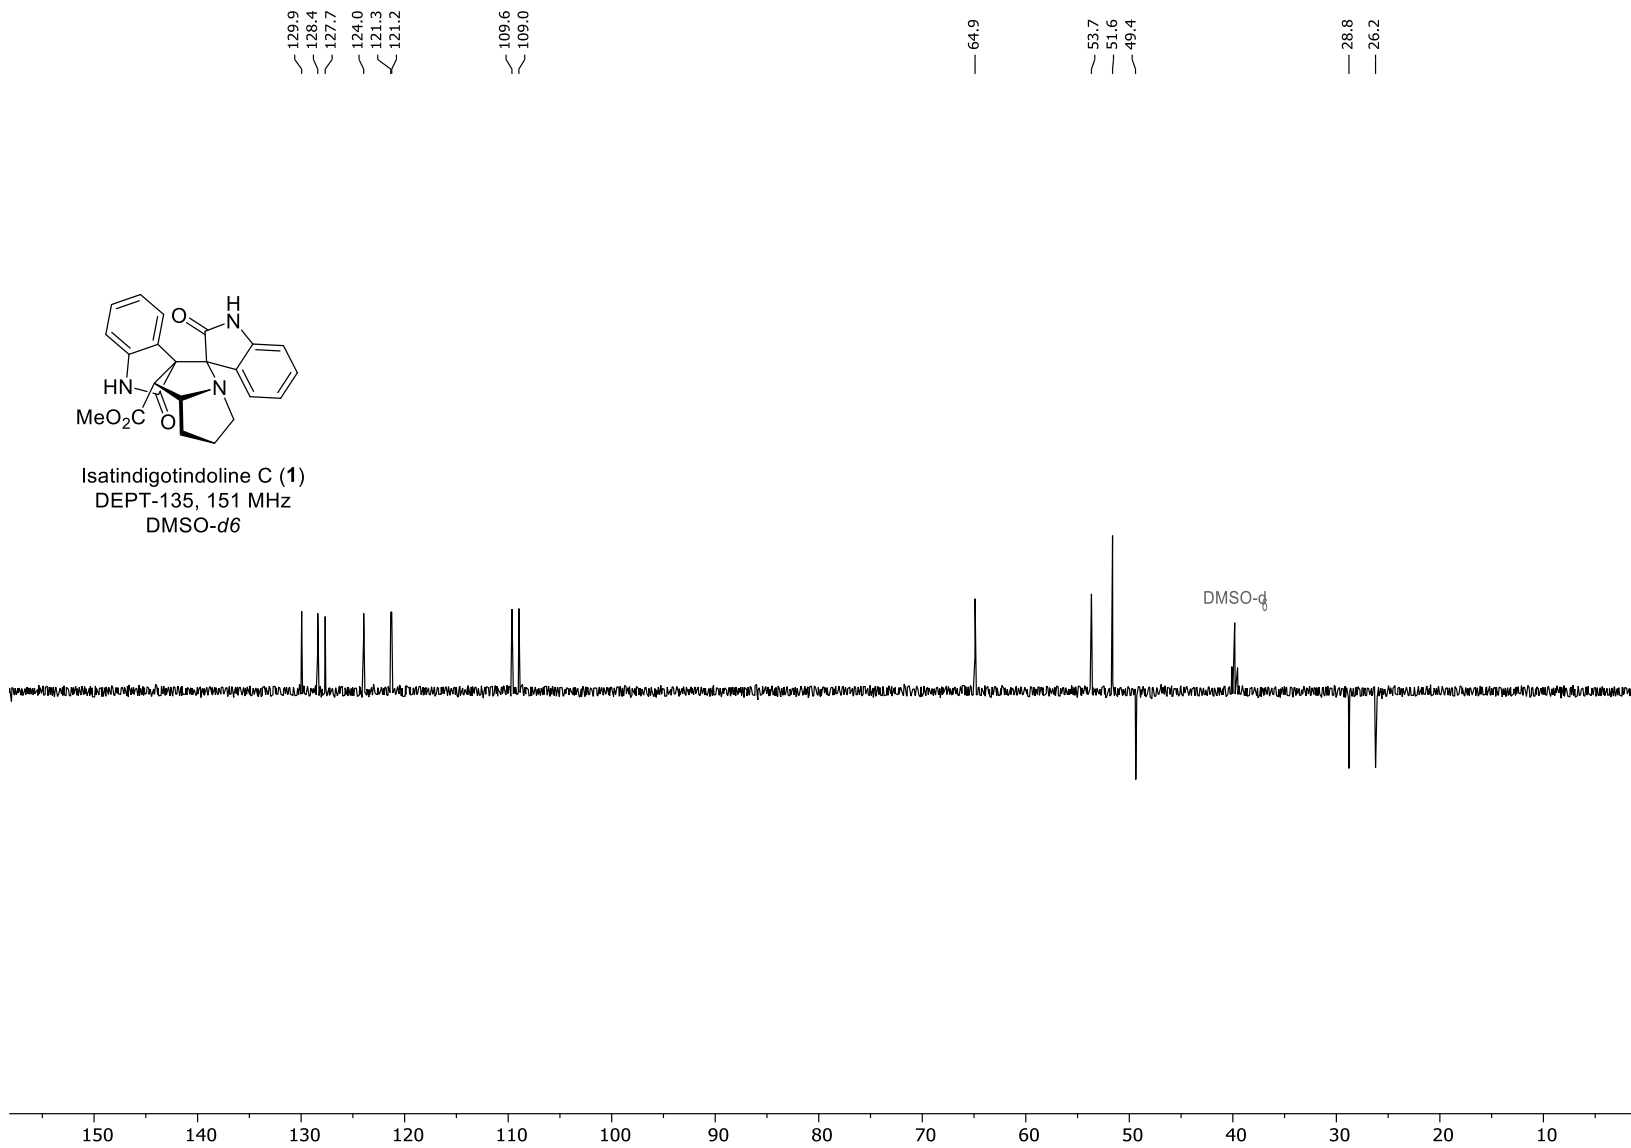

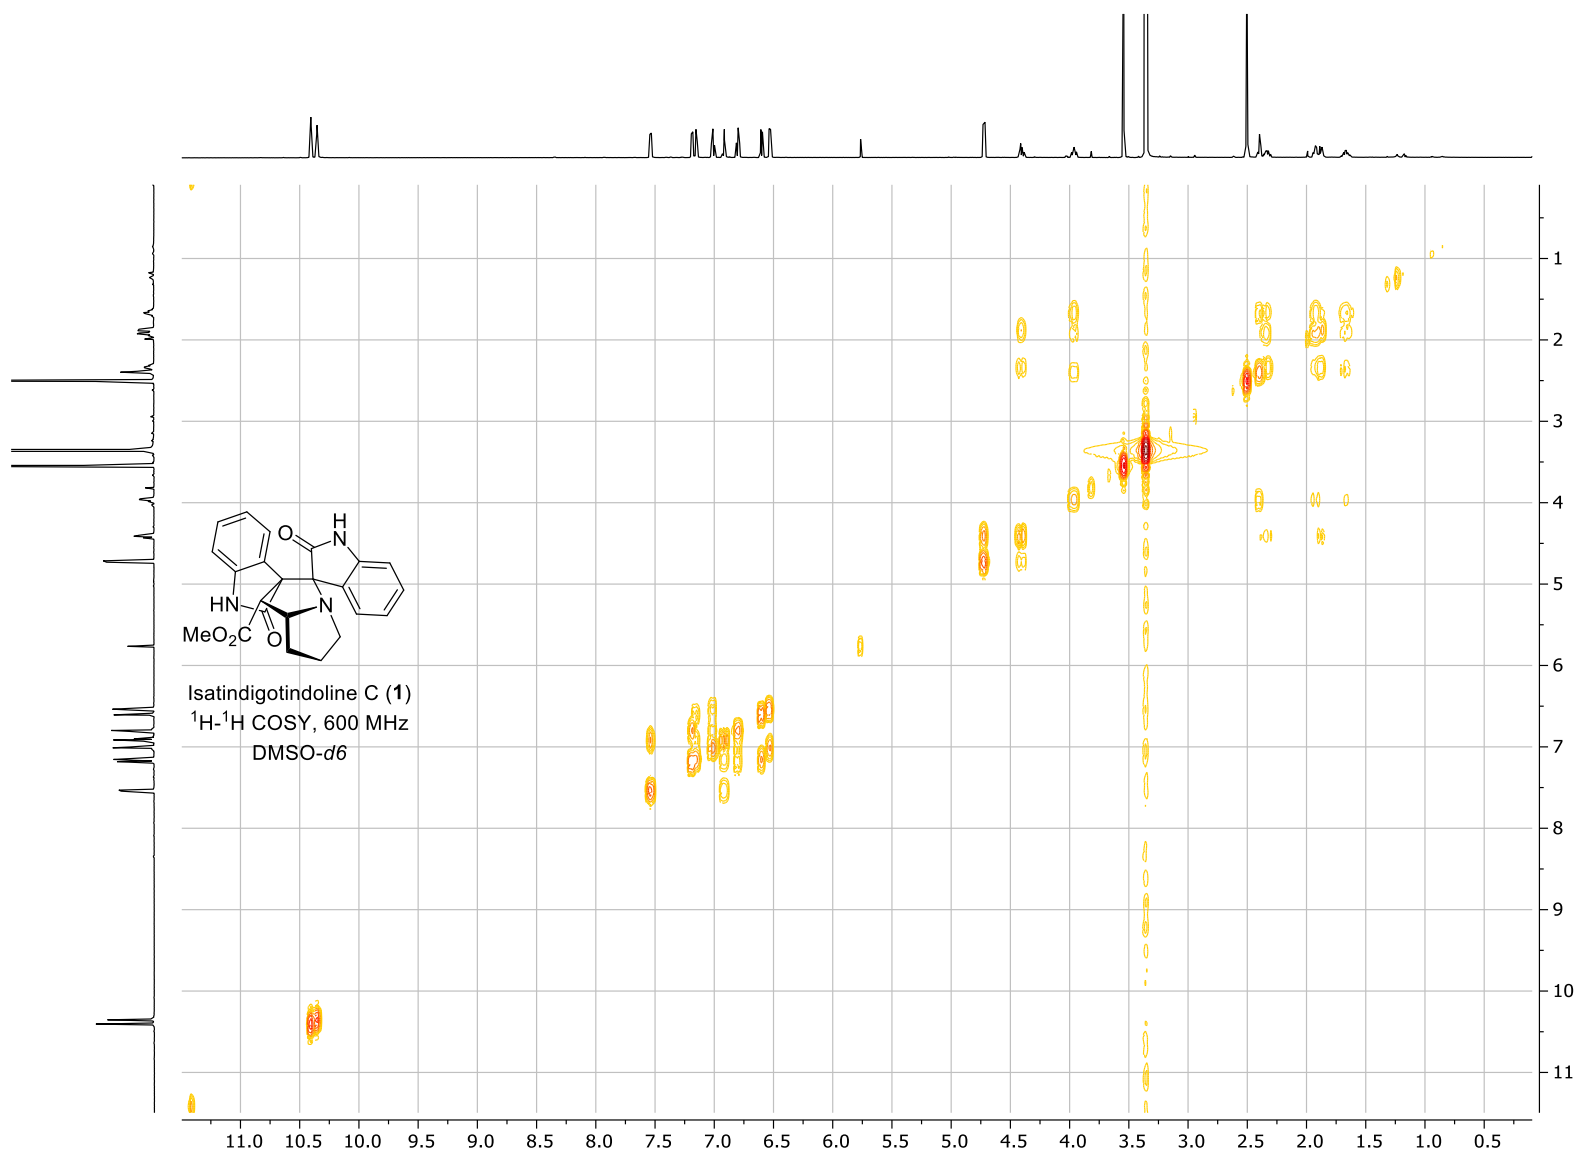

Supplement: d0ob00270d1.pdf [file d0ob00270d1.pdf]
